# Supplementary material for: A modular microfluidic platform for serial enrichment and harvest of pure extracellular vesicles
Source: Royal Society of Chemistry journal article supplement (doi:10.1039/d1an02220b), 2022-01-01
Supplement: d1an02220b1.pdf [file d1an02220b1.pdf]

**ELECTRONIC SUPPLEMENTARY INFORMATION (ESI) for**  
**A modular microfluidic platform for serial enrichment and harvest of pure**  
**extracellular vesicles**

Hogyeong Gwak,<sup>a</sup> Sunyoung Park,<sup>a</sup> Haeun Yu,<sup>a</sup> Kyung-A Hyun,<sup>\*a</sup> and Hyo-Il Jung<sup>\*a,b</sup>

<sup>a</sup> School of Mechanical Engineering, Yonsei University, Seoul, 03722, Republic of Korea. E-mail: [hyunkkuplus@gmail.com](mailto:hyunkkuplus@gmail.com), [uridle7@yonsei.ac.kr](mailto:uridle7@yonsei.ac.kr)

<sup>b</sup> The DABOM Inc, Republic of Korea. E-mail: [uridle7@yonsei.ac.kr](mailto:uridle7@yonsei.ac.kr)

\* Corresponding authors:

Kyung-A Hyun, Ph.D.

School of Mechanical Engineering, Yonsei University

Tel.: +82-2-2123-7767

E-mail: [hyunkkuplus@gmail.com](mailto:hyunkkuplus@gmail.com)

Hyo-Il Jung, Ph.D.

School of Mechanical Engineering, Yonsei University

Tel.: +82-2-2123-5814

E-mail: [uridle7@yonsei.ac.kr](mailto:uridle7@yonsei.ac.kr)

(a)

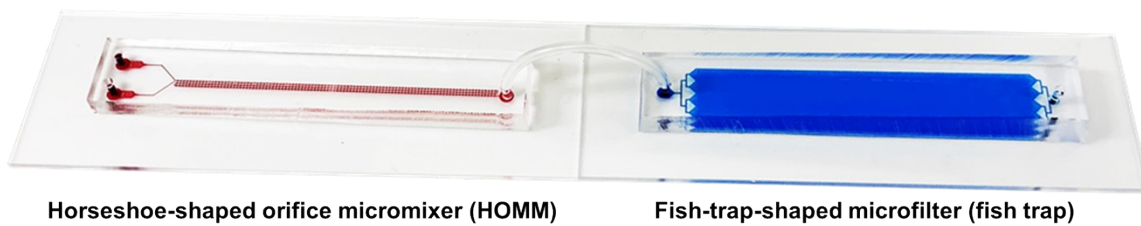

(b)

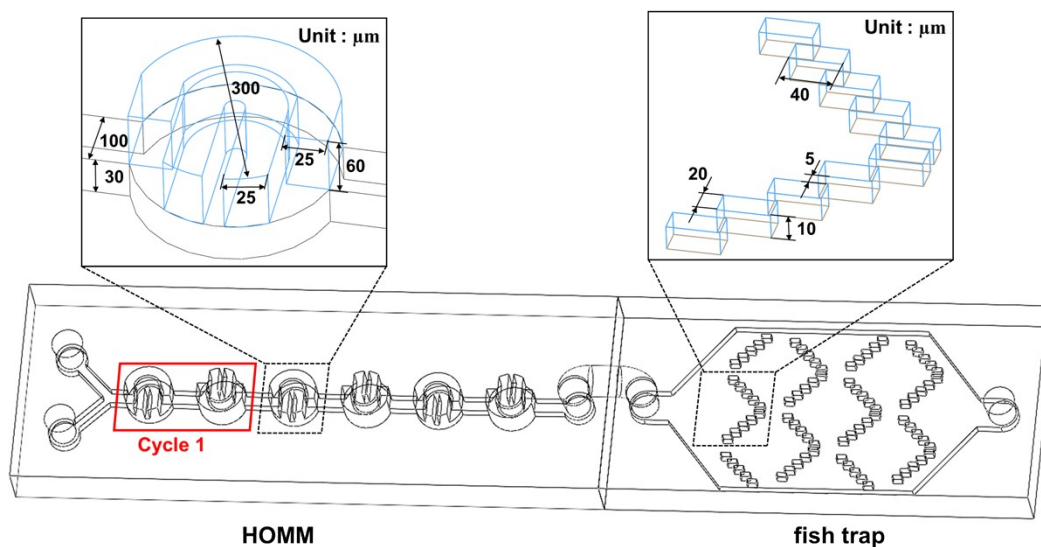

**Fig. S1** Detailed information of the fabricated modular microfluidic platform. (a) Photograph of the modular microfluidic platform, which consists of a horseshoe-shaped orifice micromixer (HOMM) and a fish-trap-shaped microfilter (fish trap). (b) Dimensions of the HOMM and fish trap chips.

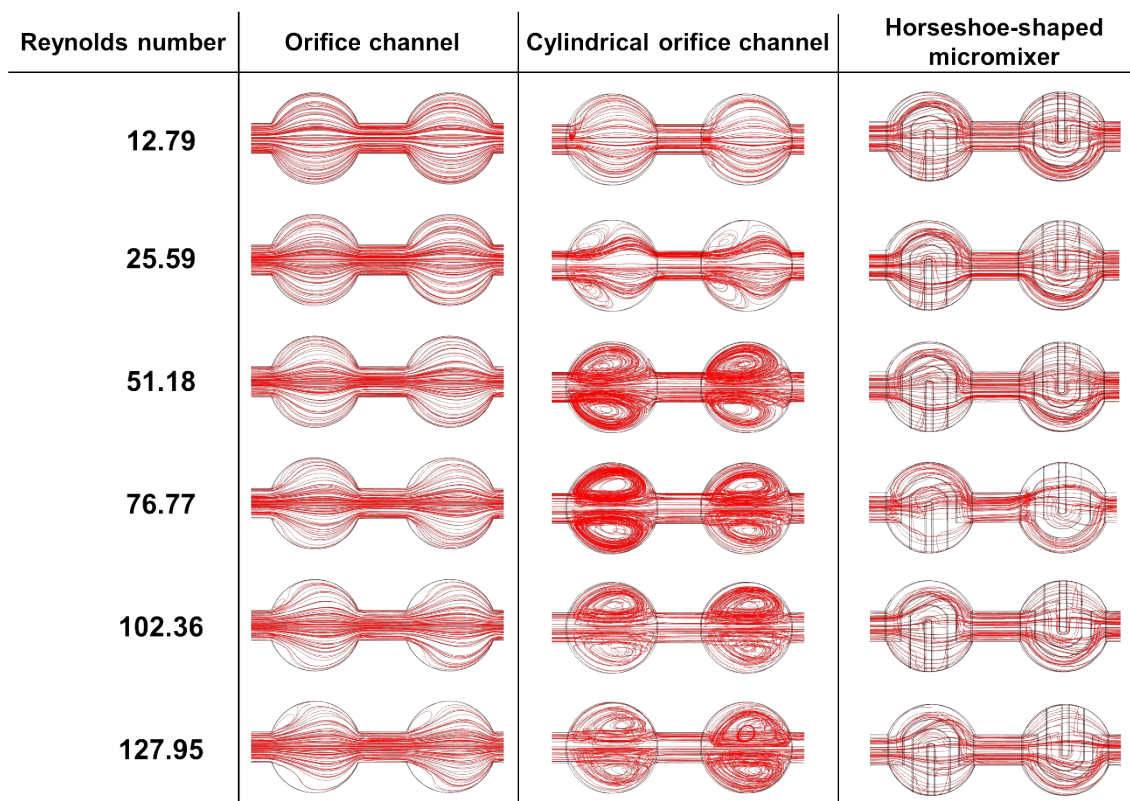

**Fig. S2** Streamline distributions in the orifice channel (OC), cylindrical orifice channel (COC), and HOMM channel for various Reynolds numbers.

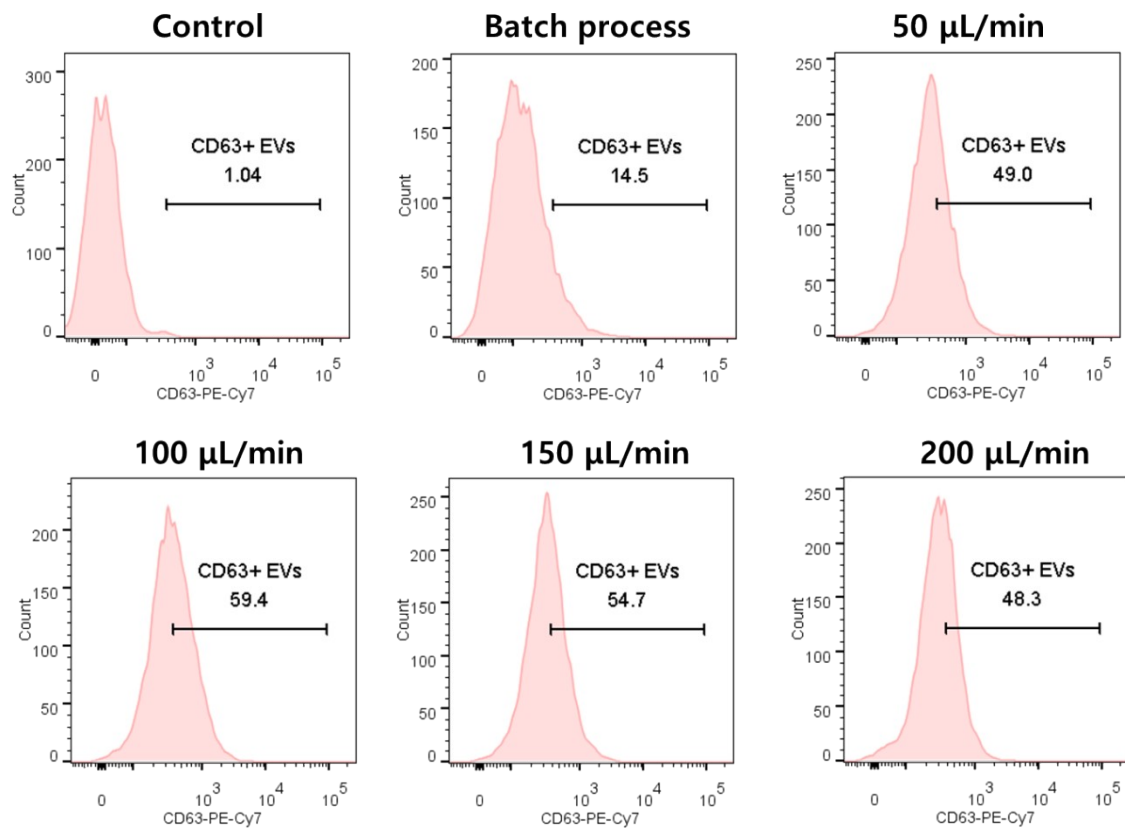

**Fig. S3** Expression levels of CD63-positive EVs on antibody-coated microbeads quantified via flow cytometry. A comparison of the expression of surface proteins analysed by a batch process and the microfluidic chip in flow rate range of 50–200  $\mu\text{L}/\text{min}$  is also shown.
